# Supplementary material for: Different inhibitory potency of febuxostat towards mammalian and bacterial xanthine oxidoreductases: insight from molecular dynamics
Source: PubMed Central journal article supplement — Sci Rep. 2012 Mar 23;2:331. doi: 10.1038/srep00331 (PMC3311054; doi:10.1038/srep00331), 2012-03-23
Supplement: srep00331-s1.pdf [file srep00331-s1.pdf]

## Supplementary information

### Different inhibitory potency of febuxostat towards mammalian and bacterial xanthine oxidoreductases: insight from molecular dynamics

#### AUTHORS:

Hiroto Kikuchi<sup>1</sup>, Hiroshi Fujisaki<sup>1,3</sup>, Tadaomi Furuta<sup>2,3</sup>, Ken Okamoto<sup>4</sup>, Silke Leimkühler<sup>5</sup>, Takeshi Nishino<sup>4,6, 7\*</sup>

<sup>1</sup>. Department of Physics, Nippon Medical School, 2-297-2 Musasikosugi, Nakahara-Ku, Kawasaki 211-0063, Japan

<sup>2</sup>. Center for Biological Resources and Informatics, Tokyo Institute of Technology, B-62 4259 Nagatsuta-cho, Midori-ku, Yokohama 226-8501, Japan

<sup>3</sup>. Computational Science Research Program, RIKEN, 2-1 Hirosawa, Wako, Saitama 351-0198, Japan

<sup>4</sup>. Department of Biochemistry, Nippon Medical School, 1-1-5 Sendagi, Bunkyo-ku, Tokyo 113-8602, Japan

<sup>5</sup>. Department of Molecular Enzymology, Institute for Biochemistry and Biology, University of Potsdam, Karl-Liebknecht Str. 24-25, 14476 Potsdam, Germany

<sup>6</sup>. Department of Biochemistry, University of California, 1463 Boyce Hall, Riverside, CA92521-0122, USA

<sup>7</sup>. Department of Applied Biological Chemistry, Graduate School of Agricultural and Life Sciences, University of Tokyo, 1-1-1 Yayoi, Bunkyo-Ku, Tokyo, 113-8657, Japan

\*Correspondence and requests for materials should be addressed to T.N. (nishino@nms.ac.jp)

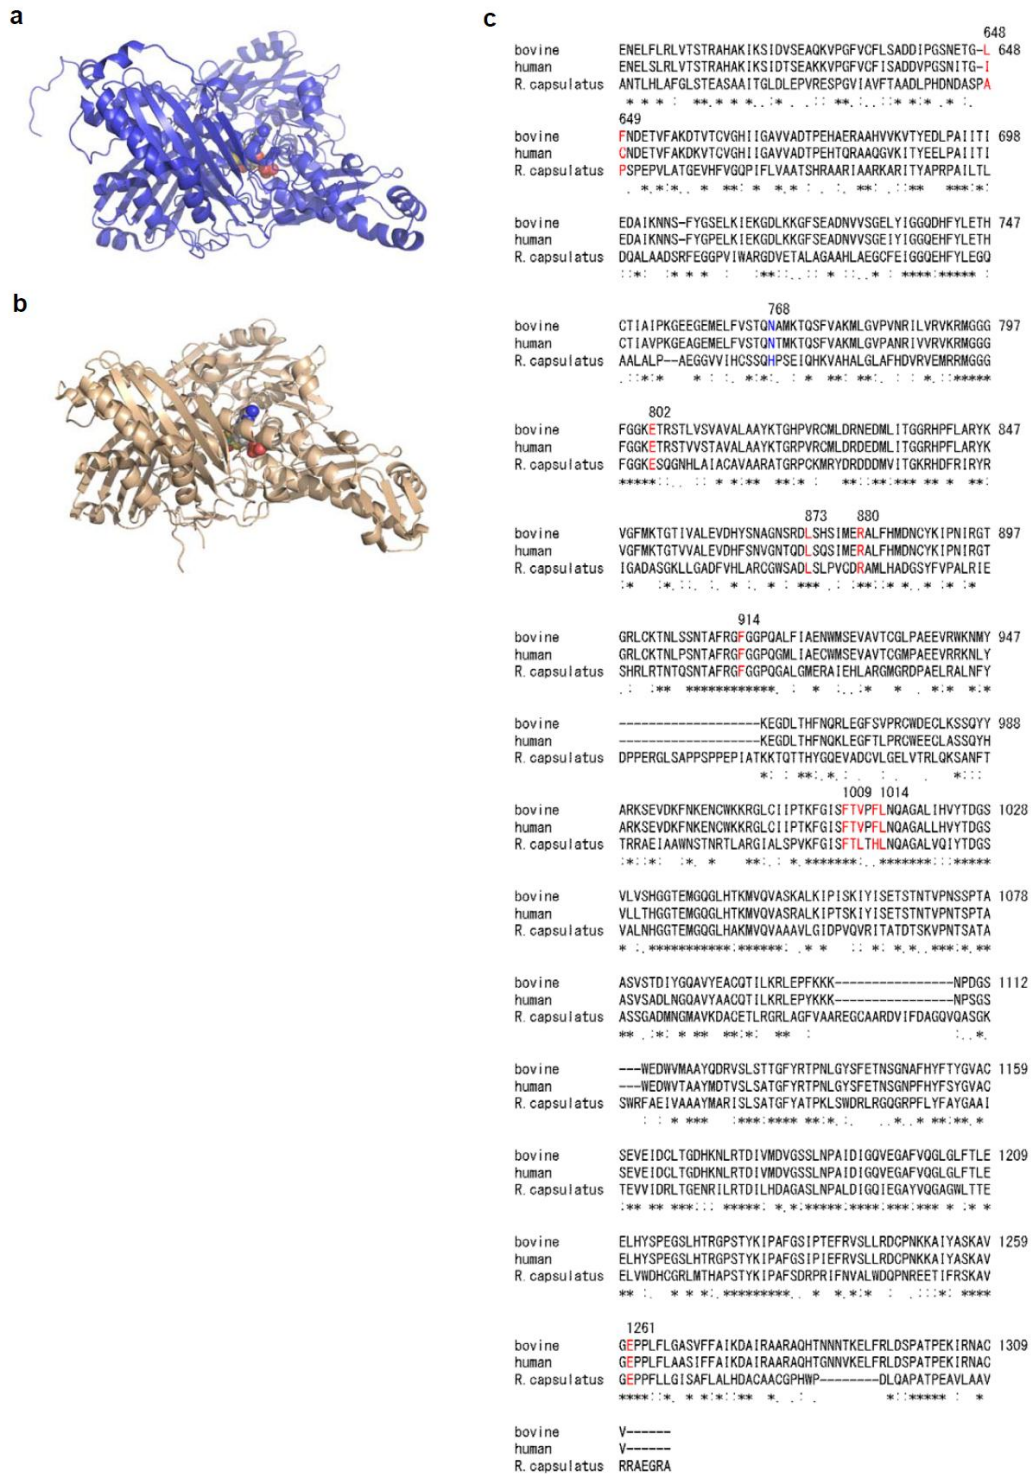

**Figure S1. Structure/sequence comparison of human, bovine, and bacterial XORs.** (a)-(b) Residues 600-1310 for bovine XOR (bXOR) and residues 30-377 & 402-777 for *Rhodobacter capsulatus* XOR (*RcXOR*), which were selected for the MD simulation, are shown. Molybdenum cofactors are shown in van der Waals presentation. (c) Alignment of bovine, human, and *R. capsulatus* amino acid sequences is shown. Residues that interact with febuxostat in bXOR and corresponding residues in human and *RcXOR* are shown in red. Asp 768 and corresponding residues are shown in blue. Conserved residues are marked with \*.

**a**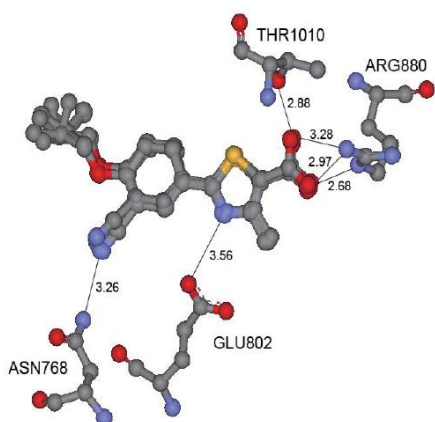**b**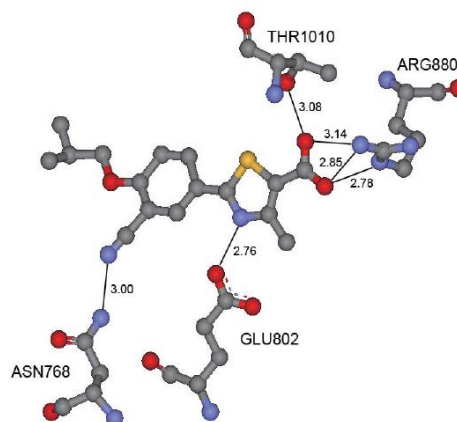**c**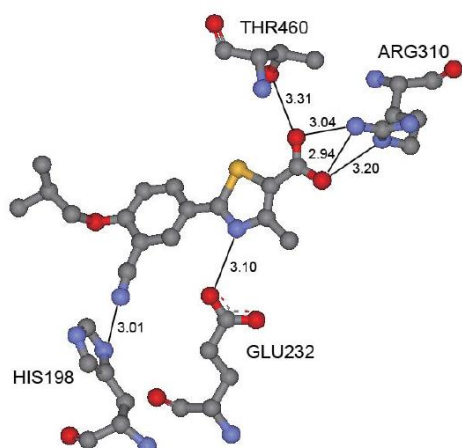

**Figure S2. Initial positions of febxostat in the cavity of bXOR or RcXOR for MD calculations.** (a) The spatial relationship between several residues in the cavity of bXOR based on PDB code 1FO4 and ten febxostat poses obtained by using a protein-ligand docking algorithm. The ten poses almost overlap each other except for the four carbon atoms of the tail: C15, C16, C17, and C18. One of them was used as the initial position of febxostat in the MD simulations, and the information on lengths was calculated using the initial position. The RMSD of all heavy atoms in febxostat between the initial position and the position of febxostat in 1N5X, which is the crystal structure of febxostat-bound bXOR in S2 (b), is 0.672 Å. The RMSD for the case of the heavy atoms without the four carbon atoms of the tail is 0.295 Å. This means that the initial position of febxostat obtained by the docking calculations is almost identical with the position of febxostat in 1N5X. (b) The spatial relationship between febxostat and several residues in the cavity of bXOR based on PDB code 1N5X. (c) The spatial relationship between febxostat and several residues in the cavity of RcXOR based on PDB code 1JRO. The position of febxostat is also one of the docking poses obtained by the docking calculations, S2 (a).

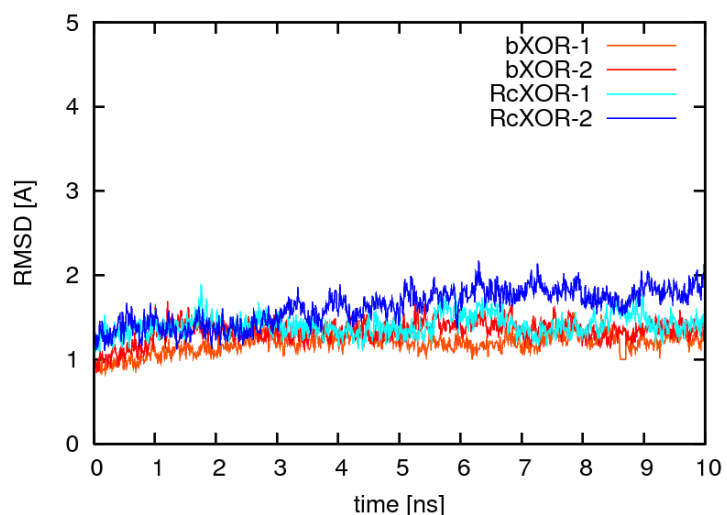

|                | avg   | sd    | min   | max   | num  | Final RMSD(10 ns) |
|----------------|-------|-------|-------|-------|------|-------------------|
| <b>bXOR-1</b>  | 1.190 | 0.120 | 0.836 | 1.562 | 1000 | 1.379             |
| <b>bXOR-2</b>  | 1.333 | 0.126 | 0.843 | 1.693 | 1000 | 1.354             |
| <b>RcXOR-1</b> | 1.405 | 0.123 | 1.023 | 1.892 | 1000 | 1.303             |
| <b>RcXOR-2</b> | 1.624 | 0.214 | 1.103 | 2.174 | 1000 | 1.907             |

So the average 1FO4 RMSD  $(1.379+1.354)/2=1.3665 \sim 1.4$

and the average 1JRO RMSD  $(1.303+1.907)/2=1.605 \sim 1.6$

**Figure S3. Backbone RMSD.** The time courses of the backbone fluctuations in terms of RMSD are shown for two characteristic runs for each species. The RMSD increase in *RcXOR-2* after ~4 ns might be caused by the movement of febuxostat.

1FO4(Blue) (Residue: Y947, K948, E949, G950, D951, L952(vdW, Purple, 4/6 res.) )  
1JRO(Red) (Residue: Y377, T402(vdW, Red), 378-401(dashed loop, Orange, 24 res.))

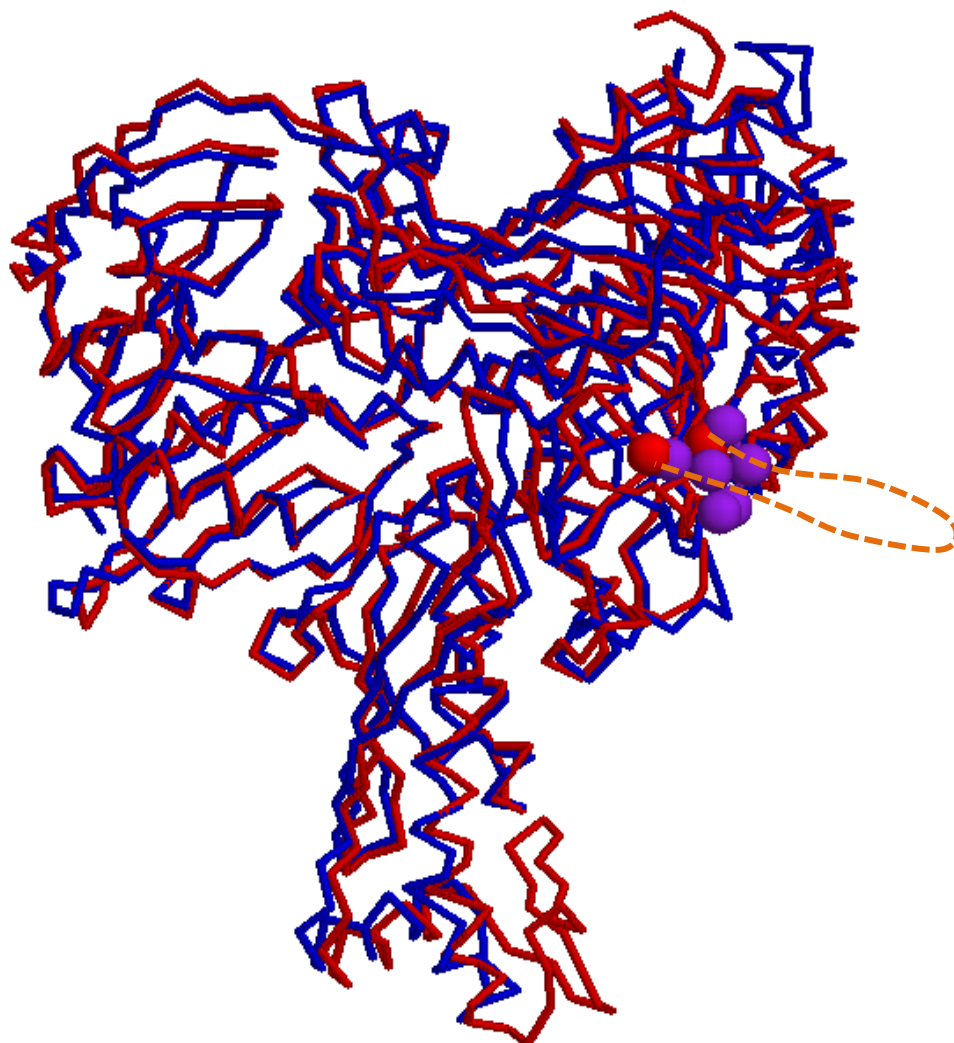

**Figure S4. Truncated (disordered) region.** In the PDB structure of bacterial XOR (1JRO), there is a structurally missing region from the 378<sup>th</sup> to 401<sup>st</sup> amino acids as depicted by the orange dashed curve here. In the MD simulations conducted in this work, the missing (possibly disordered) region was removed. See the methods section for detail.

Febuxostat(Red), Molybdopterin(Blue), Cap[NME, ACE](Green)

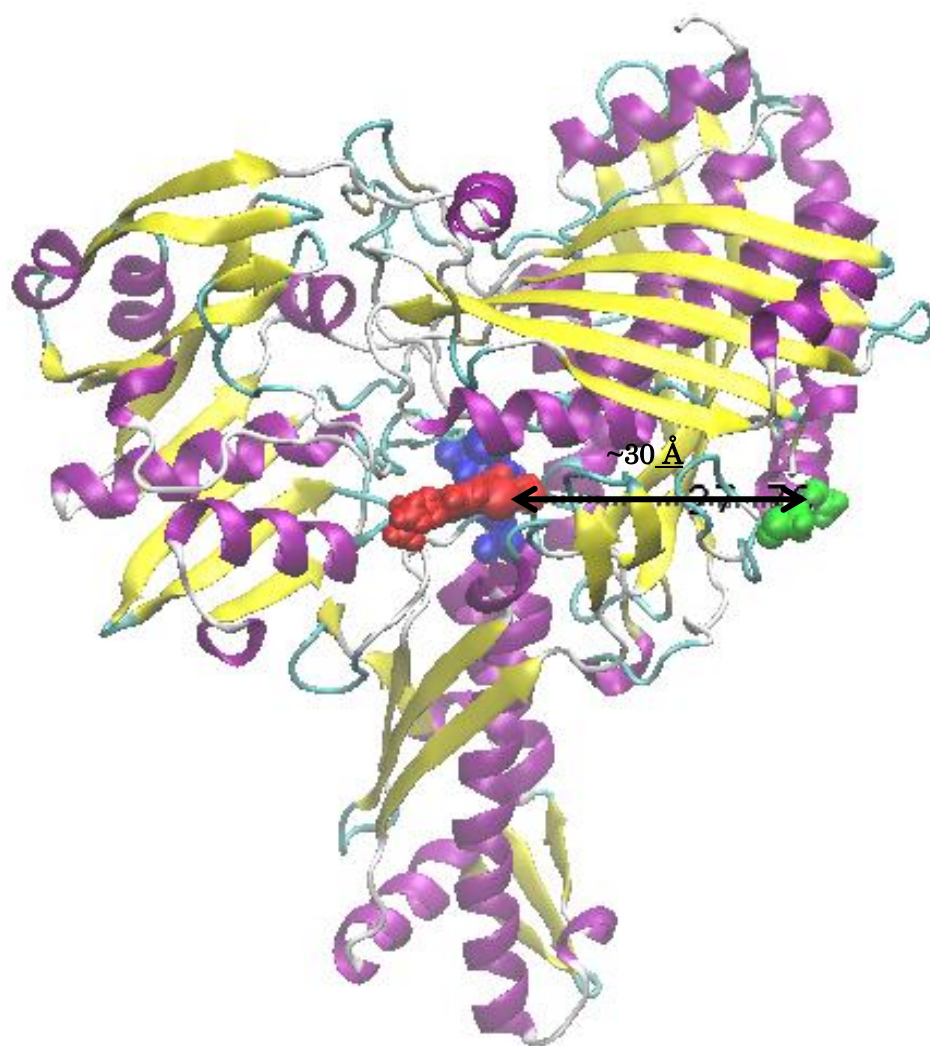

**Figure S5. Distance between febuxostat and the disordered region.** The bound febuxostat lies far (~30 Angstroms) from the capped part of the disordered region of bacterial XOR, as illustrated here.

| Partial charges for MTE part                                                                                                   |                                                                                                                                     |                                                                             |        |            |  |          |             |  |  |
|--------------------------------------------------------------------------------------------------------------------------------|-------------------------------------------------------------------------------------------------------------------------------------|-----------------------------------------------------------------------------|--------|------------|--|----------|-------------|--|--|
| <b>MTE</b>                                                                                                                     | (PHOSPHONIC ACIDMONO-(2-AMINO-5,6-DIMERCAPTO-4-OXO-3,7,8A,9,10,10A-HEXAHYDRO-4H-8-OXA-1,3,9,10-TETRAAZA-ANTHRACEN-7-YLMETHYL)ESTER) |                                                                             |        |            |  |          |             |  |  |
| Other non-electrostatic (GAFF) parameters were automatically assigned for this pyranopterin part using the antechamber module. |                                                                                                                                     |                                                                             |        |            |  |          |             |  |  |
| atom                                                                                                                           | charge                                                                                                                              |                                                                             |        |            |  |          |             |  |  |
| C1'                                                                                                                            | -0.110262                                                                                                                           |                                                                             |        |            |  |          |             |  |  |
| S1'                                                                                                                            | -0.409631                                                                                                                           |                                                                             |        |            |  |          |             |  |  |
| C2'                                                                                                                            | -0.089339                                                                                                                           |                                                                             |        |            |  |          |             |  |  |
| S2'                                                                                                                            | -0.508988                                                                                                                           |                                                                             |        |            |  |          |             |  |  |
| C3'                                                                                                                            | 0.188266                                                                                                                            |                                                                             |        |            |  |          |             |  |  |
| C4'                                                                                                                            | 0.461128                                                                                                                            |                                                                             |        |            |  |          |             |  |  |
| O3'                                                                                                                            | -0.356157                                                                                                                           |                                                                             |        |            |  |          |             |  |  |
| O4'                                                                                                                            | -0.573016                                                                                                                           |                                                                             |        |            |  |          |             |  |  |
| P                                                                                                                              | 1.288178                                                                                                                            |                                                                             |        |            |  |          |             |  |  |
| O1P                                                                                                                            | -0.790039                                                                                                                           |                                                                             |        |            |  |          |             |  |  |
| O2P                                                                                                                            | -0.791697                                                                                                                           |                                                                             |        |            |  |          |             |  |  |
| O3P                                                                                                                            | -0.780348                                                                                                                           |                                                                             |        |            |  |          |             |  |  |
| N1                                                                                                                             | -0.805805                                                                                                                           |                                                                             |        |            |  |          |             |  |  |
| C2                                                                                                                             | 0.843612                                                                                                                            |                                                                             |        |            |  |          |             |  |  |
| N2                                                                                                                             | -0.985533                                                                                                                           |                                                                             |        |            |  |          |             |  |  |
| N3                                                                                                                             | -0.657014                                                                                                                           |                                                                             |        |            |  |          |             |  |  |
| C4                                                                                                                             | 0.518219                                                                                                                            |                                                                             |        |            |  |          |             |  |  |
| O4                                                                                                                             | -0.615023                                                                                                                           |                                                                             |        |            |  |          |             |  |  |
| N5                                                                                                                             | -0.431553                                                                                                                           |                                                                             |        |            |  |          |             |  |  |
| C6                                                                                                                             | 0.150907                                                                                                                            |                                                                             |        |            |  |          |             |  |  |
| C7                                                                                                                             | 0.334505                                                                                                                            |                                                                             |        |            |  |          |             |  |  |
| N8                                                                                                                             | -0.706836                                                                                                                           |                                                                             |        |            |  |          |             |  |  |
| C9                                                                                                                             | -0.220222                                                                                                                           |                                                                             |        |            |  |          |             |  |  |
| C10                                                                                                                            | 0.628876                                                                                                                            |                                                                             |        |            |  |          |             |  |  |
| HC3'                                                                                                                           | 0.018031                                                                                                                            |                                                                             |        |            |  |          |             |  |  |
| HC4'1                                                                                                                          | 0.004078                                                                                                                            |                                                                             |        |            |  |          |             |  |  |
| HC4'2                                                                                                                          | -0.015572                                                                                                                           |                                                                             |        |            |  |          |             |  |  |
| HN21                                                                                                                           | 0.396006                                                                                                                            |                                                                             |        |            |  |          |             |  |  |
| HN22                                                                                                                           | 0.349318                                                                                                                            |                                                                             |        |            |  |          |             |  |  |
| HN3                                                                                                                            | 0.353928                                                                                                                            |                                                                             |        |            |  |          |             |  |  |
| HN5                                                                                                                            | 0.338535                                                                                                                            |                                                                             |        |            |  |          |             |  |  |
| HC6                                                                                                                            | 0.010644                                                                                                                            |                                                                             |        |            |  |          |             |  |  |
| HC7                                                                                                                            | 0.019511                                                                                                                            |                                                                             |        |            |  |          |             |  |  |
| HN8                                                                                                                            | 0.377365                                                                                                                            |                                                                             |        |            |  |          |             |  |  |
| <b>Force Field parameters for MOS part</b>                                                                                     |                                                                                                                                     |                                                                             |        |            |  |          |             |  |  |
| <b>MOS (DIOXOTHIOMOLYBDENUM(VI) ION)</b>                                                                                       |                                                                                                                                     | <b>Bond length including MO (in MTE-MOS complex)</b>                        |        |            |  |          |             |  |  |
| atom                                                                                                                           | charge                                                                                                                              |                                                                             | bond   | length [Å] |  | bond     | angle [deg] |  |  |
| MO                                                                                                                             | 1.096299 (mass: 95.94)                                                                                                              |                                                                             | S1'-MO | 2.552      |  | S-MO-O1  | 100.029     |  |  |
| O1                                                                                                                             | -0.689388                                                                                                                           |                                                                             | S2'-MO | 2.431      |  | S-MO-O2  | 100.031     |  |  |
| O2                                                                                                                             | -0.487081                                                                                                                           |                                                                             | S-MO   | 2.023      |  | O1-MO-O2 | 100.010     |  |  |
| S                                                                                                                              | -0.688175                                                                                                                           |                                                                             | O1-MO  | 1.950      |  |          |             |  |  |
| HO1                                                                                                                            | 0.334271                                                                                                                            |                                                                             | O2-MO  | 1.716      |  |          |             |  |  |
| <u>Hydrogen bond:</u>                                                                                                          |                                                                                                                                     | Strong force coefficients were assigned for bond lengths /                  |        |            |  |          |             |  |  |
| MOS(HO1)-Glu1261(OE2) in mammalian                                                                                             |                                                                                                                                     | bond angles: 5000 kcal/mol Å <sup>2</sup> / 500 kcal/mol deg <sup>2</sup> . |        |            |  |          |             |  |  |
| MOS(HO1)-Glu730(OE2) in bacteria                                                                                               |                                                                                                                                     | (Standard values were assigned for dihedral etc.)                           |        |            |  |          |             |  |  |

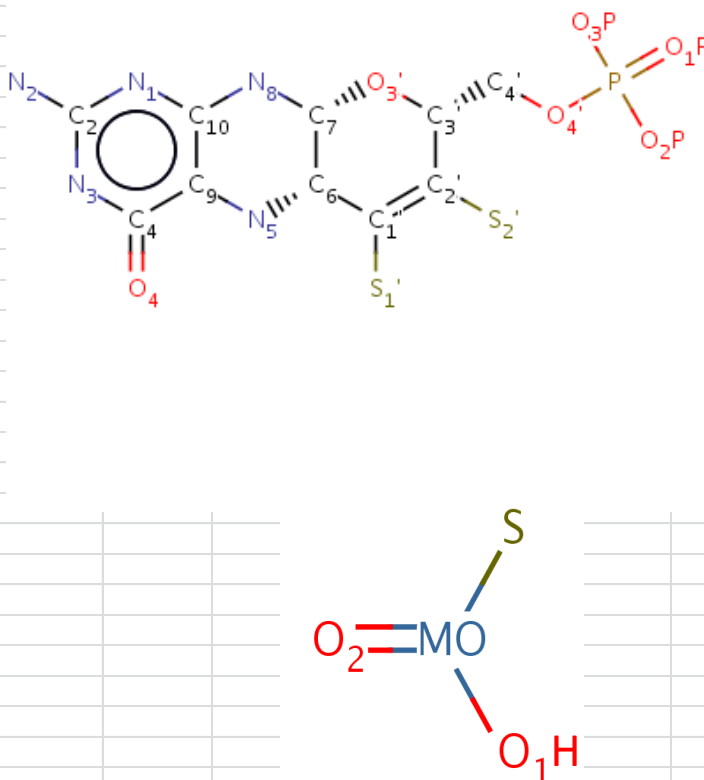

**Figure S6. Parameters for MTE and MOS (MTS).** For the parameterization of molybdenum cofactor (called MTS here) for molecular dynamics simulations, the molecule was first decomposed into two fragments, MTE and MOS. The partial charges for each fragment are shown here with non-electrostatic parameters for the Amber force field.
